# Supplementary material for: Insights into the interfacial carrier behaviour of copper ferrite (CuFe2O4) photoanodes for solar water oxidation
Source: Royal Society of Chemistry journal article supplement (doi:10.1039/c8ta11160j), 2018-12-20
Supplement: c8ta11160j1.pdf [file c8ta11160j1.pdf]

# Insights into the Interfacial Carrier Behaviour of Copper Ferrite ( $\text{CuFe}_2\text{O}_4$ ) Photoanodes for Solar Water Oxidation

Yongpeng Liu, Florian Le Formal, Florent Boudoire, Liang Yao, Kevin Sivula,\*  
and Néstor Guijarro\*

*Laboratory for Molecular Engineering of Optoelectronic Nanomaterials, École Polytechnique  
Fédérale de Lausanne (EPFL), Station 6, 1015 Lausanne, Switzerland*

E-mail: kevin.sivula@epfl.ch; nestor.guijarro@epfl.ch

## List of Figures

|                                                                                    |    |
|------------------------------------------------------------------------------------|----|
| Figure S1: Top-view and cross-sectional SEM image . . . . .                        | S2 |
| Figure S2: Raman spectrum . . . . .                                                | S3 |
| Figure S3: UV-Vis absorption spectrum . . . . .                                    | S4 |
| Figure S4: Photocurrent under LED illumination . . . . .                           | S4 |
| Figure S5: Mean transit time for photogenerated electrons ( $\tau_d$ ) . . . . .   | S5 |
| Figure S6: Substrate-side illumination and electrolyte-side illumination . . . . . | S5 |
| Figure S7: <i>in situ</i> UV-Vis spectra . . . . .                                 | S6 |

## Morphology

SEM images of nanostructured  $\text{CuFe}_2\text{O}_4$  photoanode are shown in the left panel of Figure S1. SEM setup (Zeiss Merlin) for these images are 2 kV electron high tension (EHT), 100 pA probe current, 3 mm working distance (WD) and annular secondary electrons detector (In-Lens).

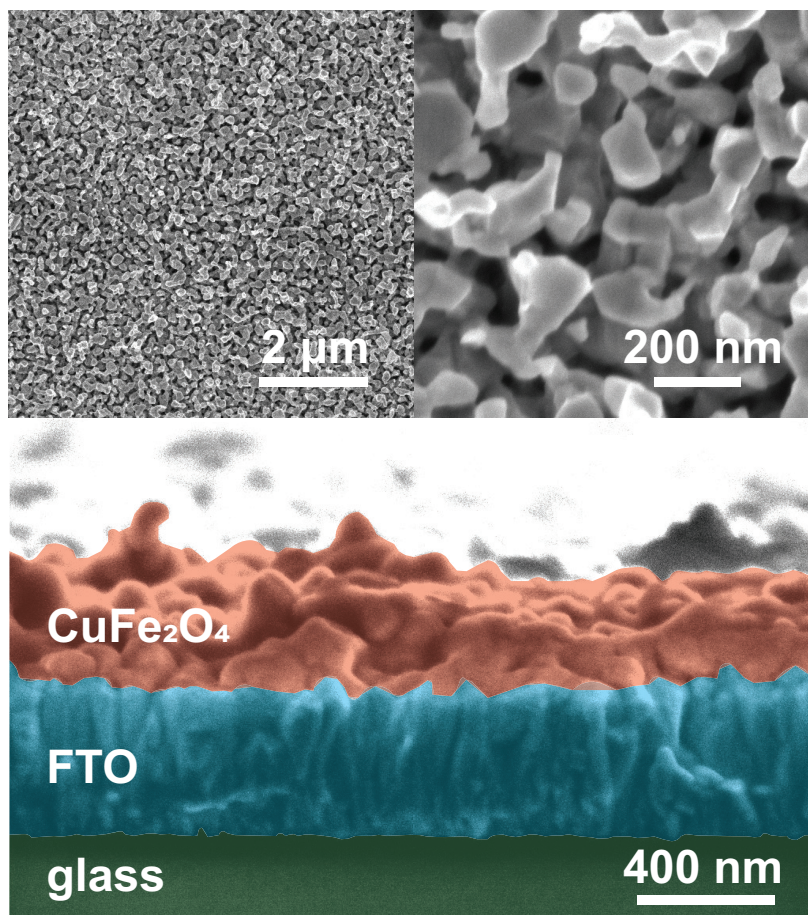

**Figure S1:** Top-view and cross-sectional SEM image of  $\text{CuFe}_2\text{O}_4$  photoanode.

## Raman spectrum

Raman spectroscopy was performed with a Raman microscopy (HORIBA Jobin Yvon XploRA PLUS) coupled with an optical microscope (Olympus BX41). The assignment of Raman peaks is displayed in Table S1.<sup>s1-s4</sup>

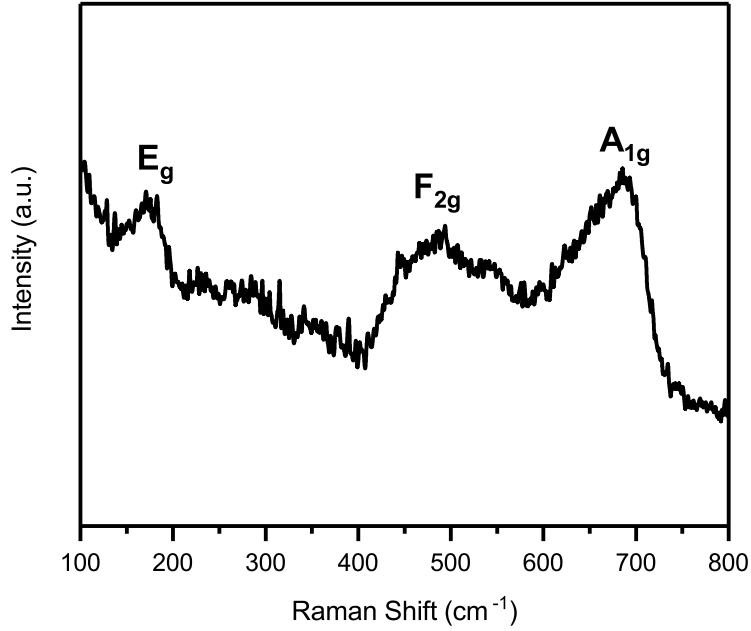

**Figure S2:** Raman spectrum of CuFe<sub>2</sub>O<sub>4</sub> photoanode.

Table S1: Assignment of Raman peaks on CuFe<sub>2</sub>O<sub>4</sub>.

| Assignment      | Raman Shift (cm <sup>-1</sup> ) |
|-----------------|---------------------------------|
| E <sub>g</sub>  | 168                             |
| F <sub>2g</sub> | 483                             |
| A <sub>1g</sub> | 674                             |

## UV-Vis absorption spectrum

The UV-Vis absorption spectrum was recorded by a UV-Vis spectrophotometer (Shimadzu UV-3600).

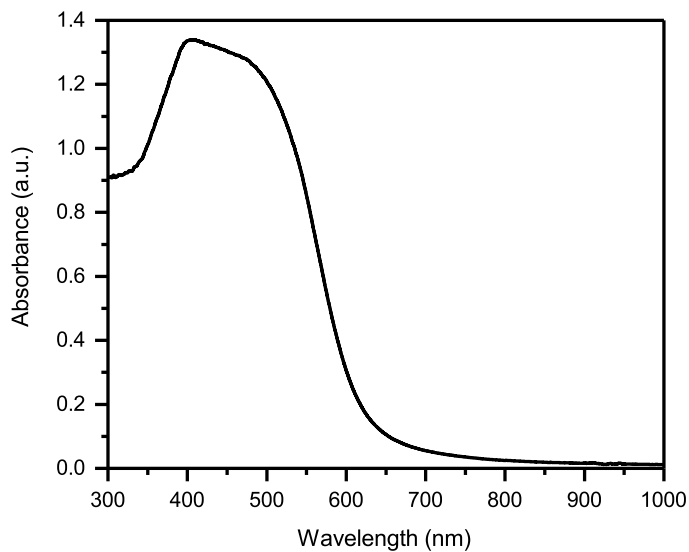

**Figure S3:** UV-Vis absorption spectrum of CuFe<sub>2</sub>O<sub>4</sub> photoanode.

## Photocurrent under LED illumination

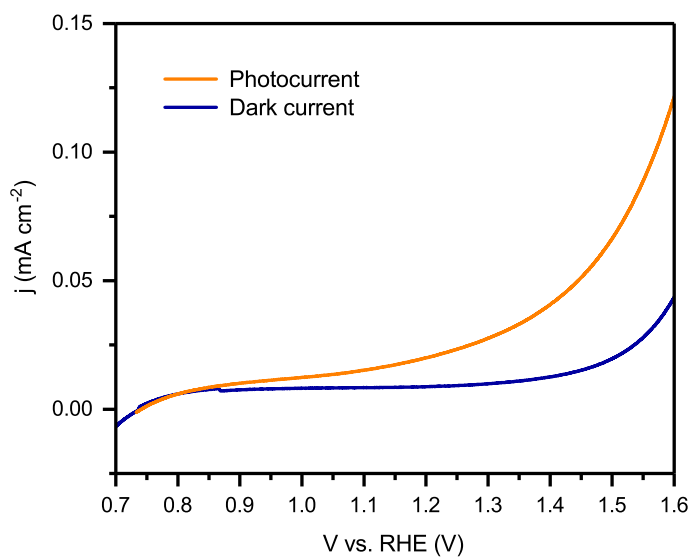

**Figure S4:** Current-voltage characteristics of CuFe<sub>2</sub>O<sub>4</sub> photoanode measured under LED irradiation and dark condition in 1 M NaOH electrolyte.

## Mean transit time for photogenerated electrons ( $\tau_d$ )

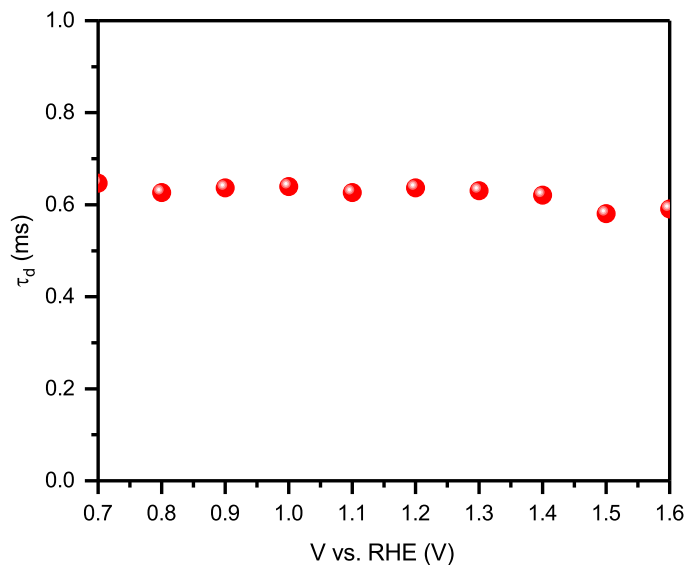

**Figure S5:** Mean transit time for photogenerated electrons ( $\tau_d$ ) as a function of applied potential.

## Substrate-side illumination and electrolyte-side illumination

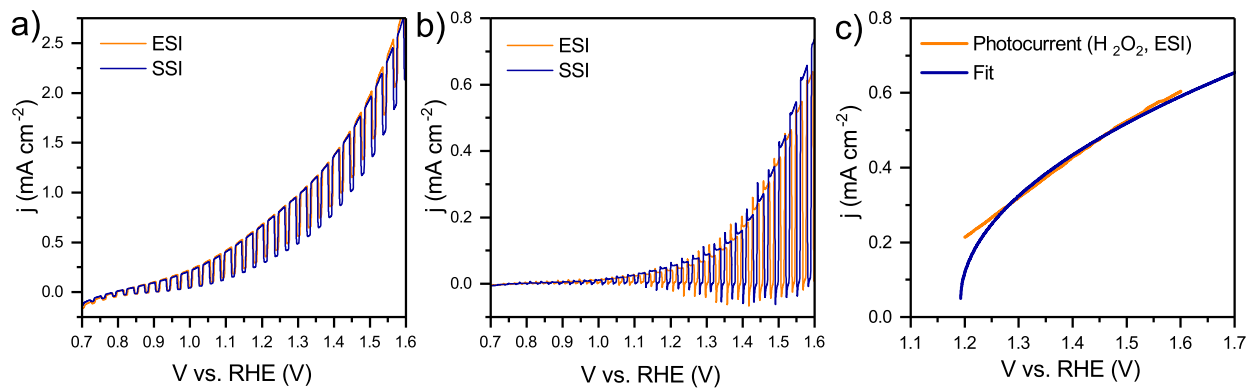

**Figure S6:** The effect of substrate-side illumination (SSI) and electrolyte-side illumination (ESI) on the photocurrent of CuFe<sub>2</sub>O<sub>4</sub> photoanode measured under 452 nm monochromatic illumination (a) with and (b) without H<sub>2</sub>O<sub>2</sub>. (c) Gartner model fitting of photocurrent.

## *in situ* UV-Vis spectra

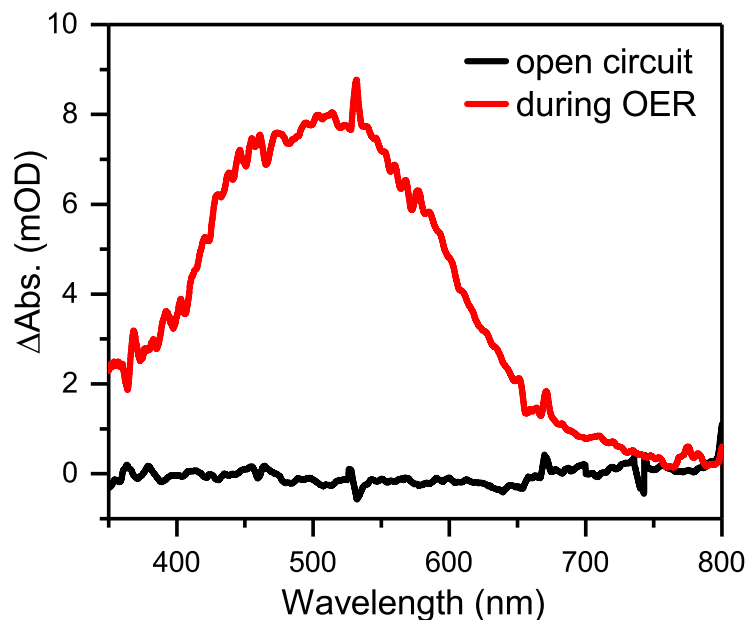

**Figure S7:** *in situ* UV-Vis absorption spectra of a  $\text{CuFe}_2\text{O}_4$  photoanode measured under open circuit conditions and during OER under an applied bias of 1.8 V vs RHE.

## References

- (S1) Guijarro, N.; Borno, P.; Prevot, M.; Yu, X.; Zhu, X.; Johnson, M.; Jeanbourquin, X.; Le Formal, F.; Sivula, K. *Sustainable Energy & Fuels* **2018**, *2*, 103–117.
- (S2) Chatterjee, B. K.; Bhattacharjee, K.; Dey, A.; Ghosh, C. K.; Chattopadhyay, K. K. *Dalton Transactions* **2014**, *43*, 7930–7944.
- (S3) Verma, K.; Kumar, A.; Varshney, D. *Current Applied Physics* **2013**, *13*, 467–473.
- (S4) Silva, M.; Silva, F.; Sinfrônio, F.; Paschoal, A.; Silva, E.; Paschoal, C. *Journal of Alloys and Compounds* **2014**, *584*, 573–580.
